# Supplementary material for: Estimating Actual Evapotranspiration over Croplands Using Vegetation Index Methods and Dynamic Harvested Area
Source: MDPI journal article supplement (doi:10.3390/rs13245167), 2021-12-20
Supplement: s1 [file s1]

## **Supplementary Materials**

### **Estimating Actual Evapotranspiration Over Croplands Using Vegetation Index Methods And Dynamic Harvested Area**

**Abbasi, et al.**

#### **Includes:**

**Figures S1-S11**

**Table S1**

Acronyms: ET-EVI2<sub>MccL</sub> and ET-EVI<sub>MccL</sub>: ET calculated using 2- and 3-band Enhanced Vegetation Index (MODIS continuity corrected Landsat) respectively; ET-EVI2<sub>ccL</sub> and ET-EVI<sub>ccL</sub>: ET calculated using 2- and 3-band Enhanced Vegetation Index (continuity-corrected Landsat) respectively.

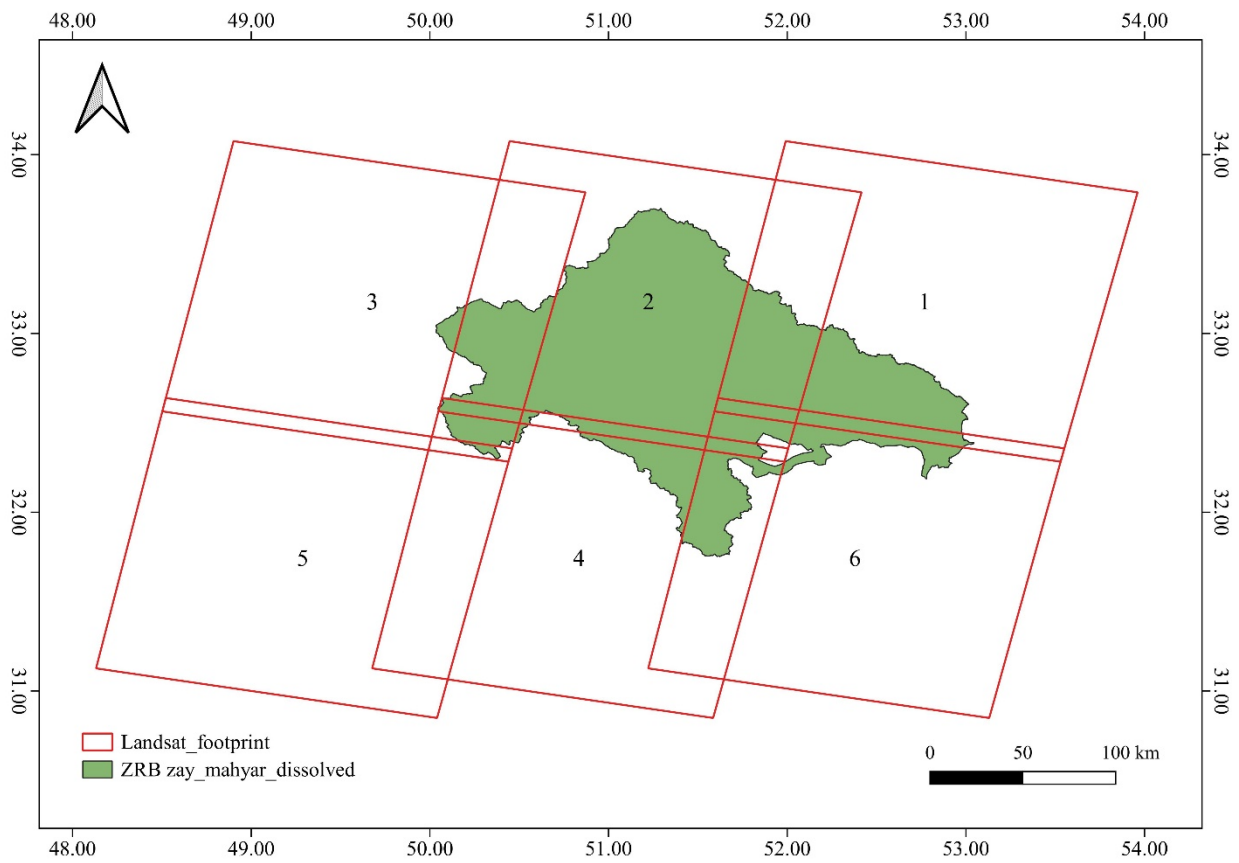

**Figure S1.** Landsat footprint. Five tiles (1,2,3,4,6) with maximum coverage of the study area were used.

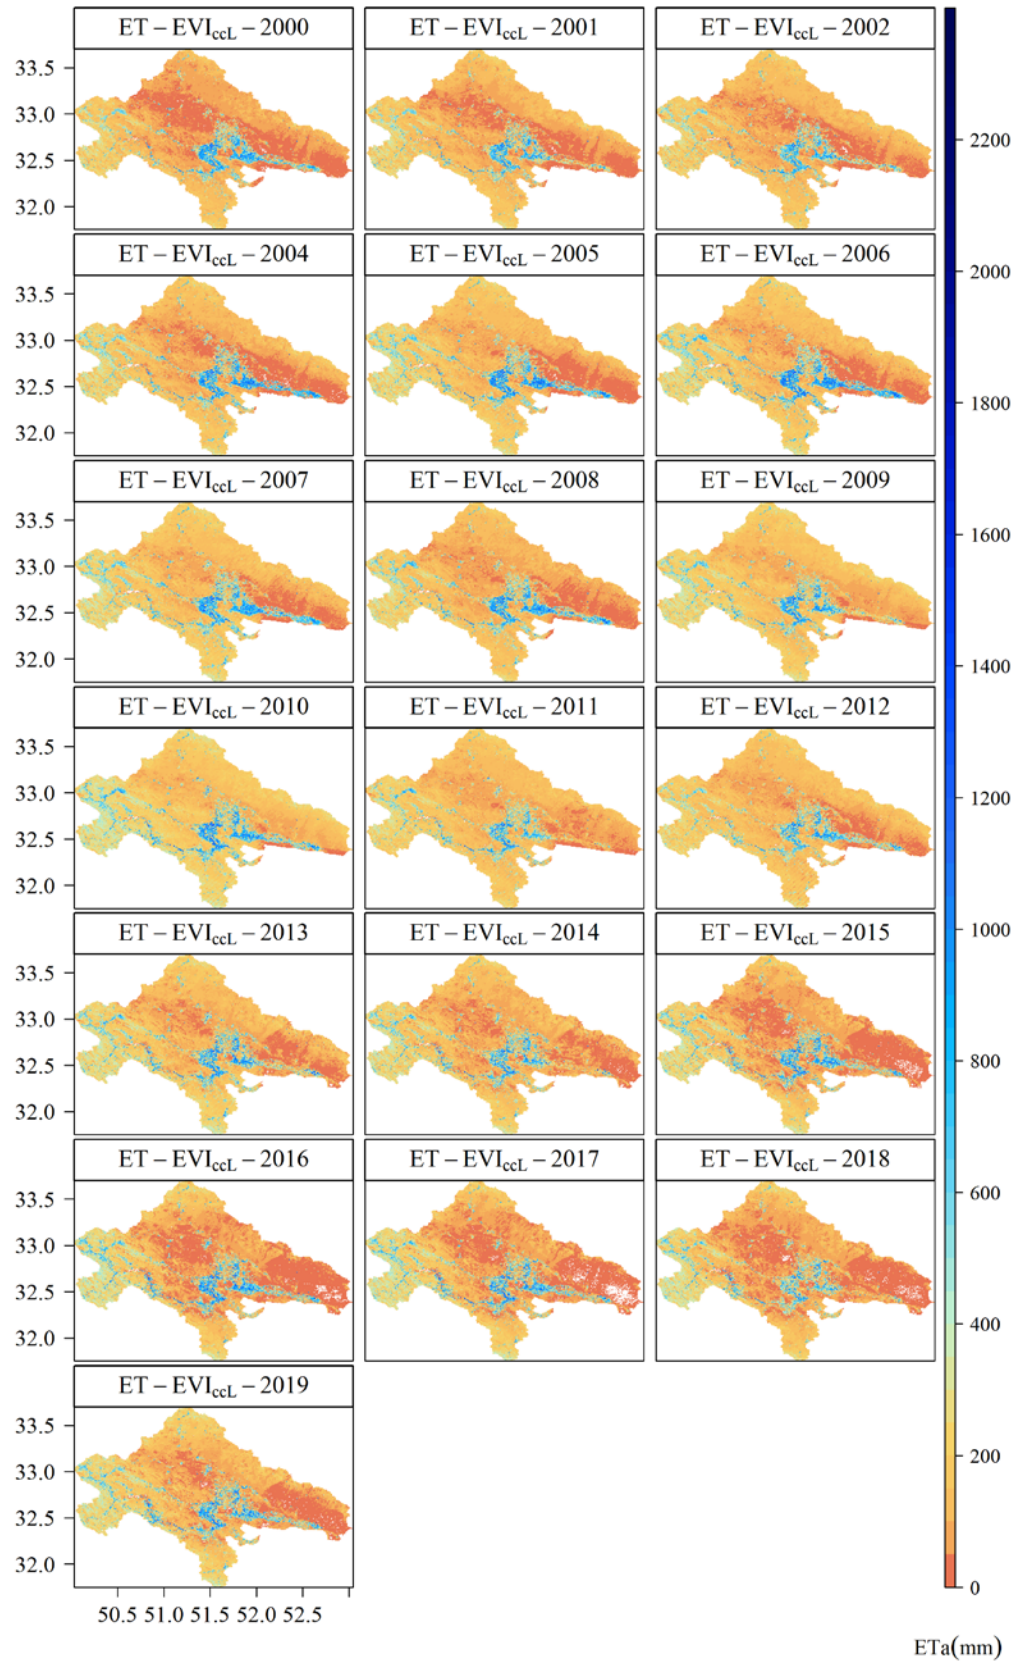

**Figure S2.** Annual maps of ET-EVI<sub>ccL</sub>.

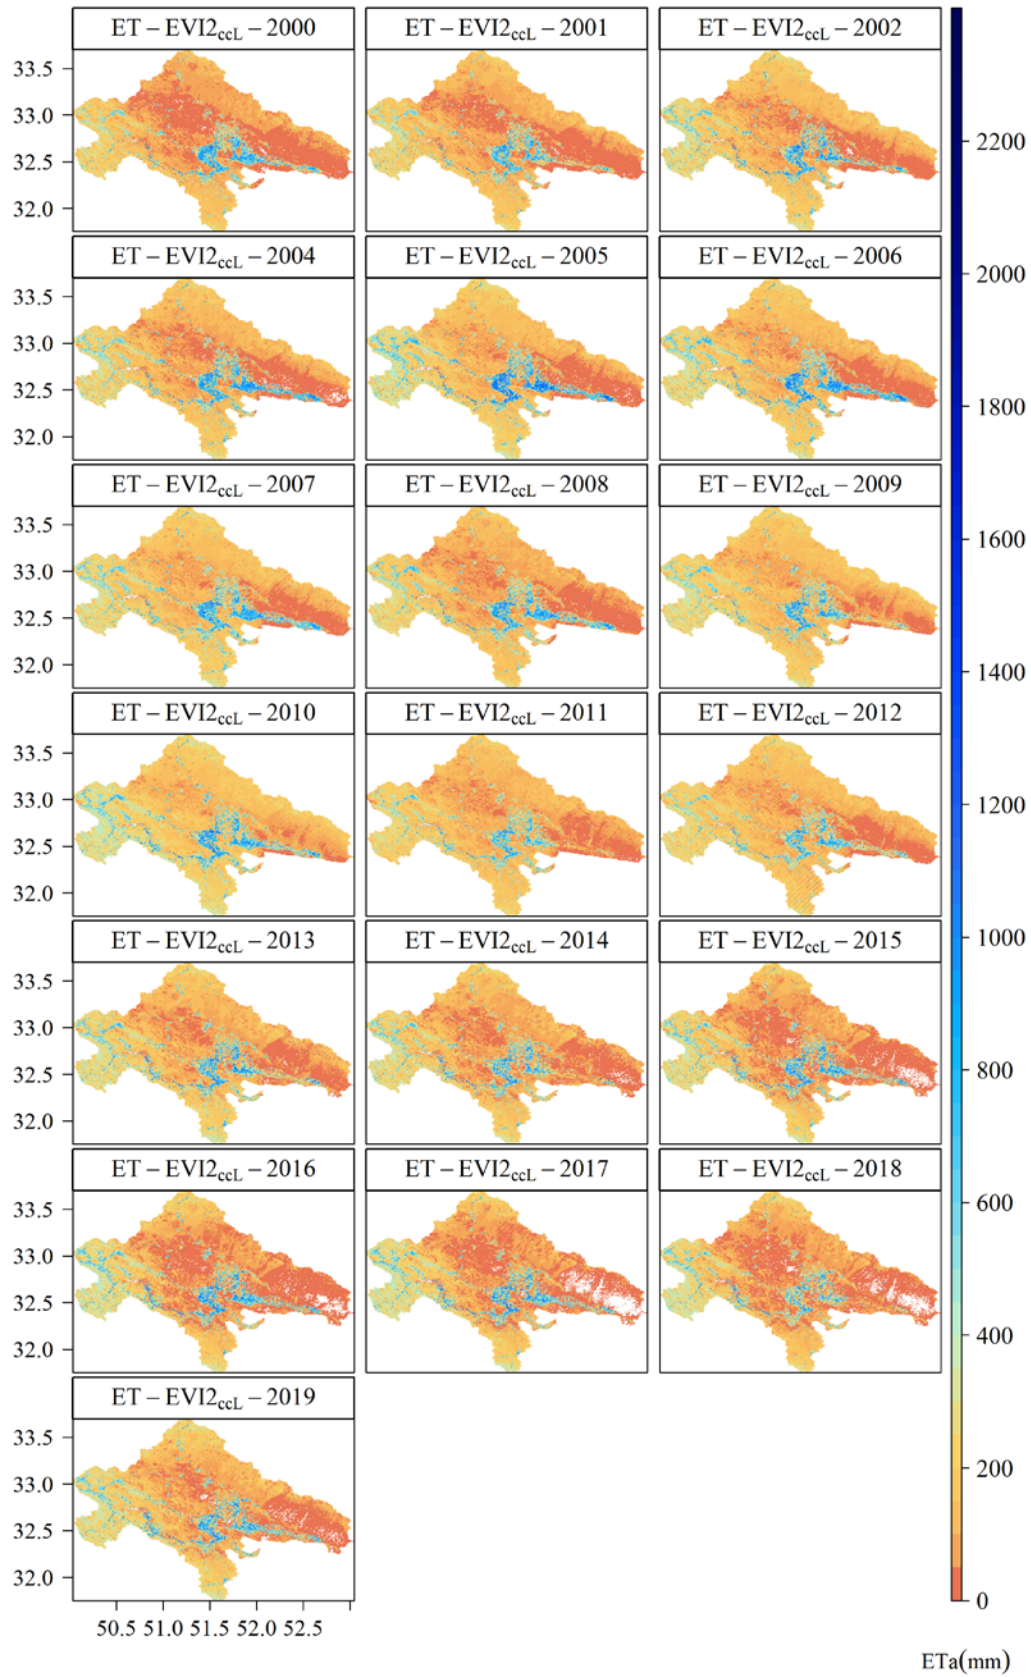

**Figure S3.** Annual maps of ET-EVI2<sub>ccL</sub>.

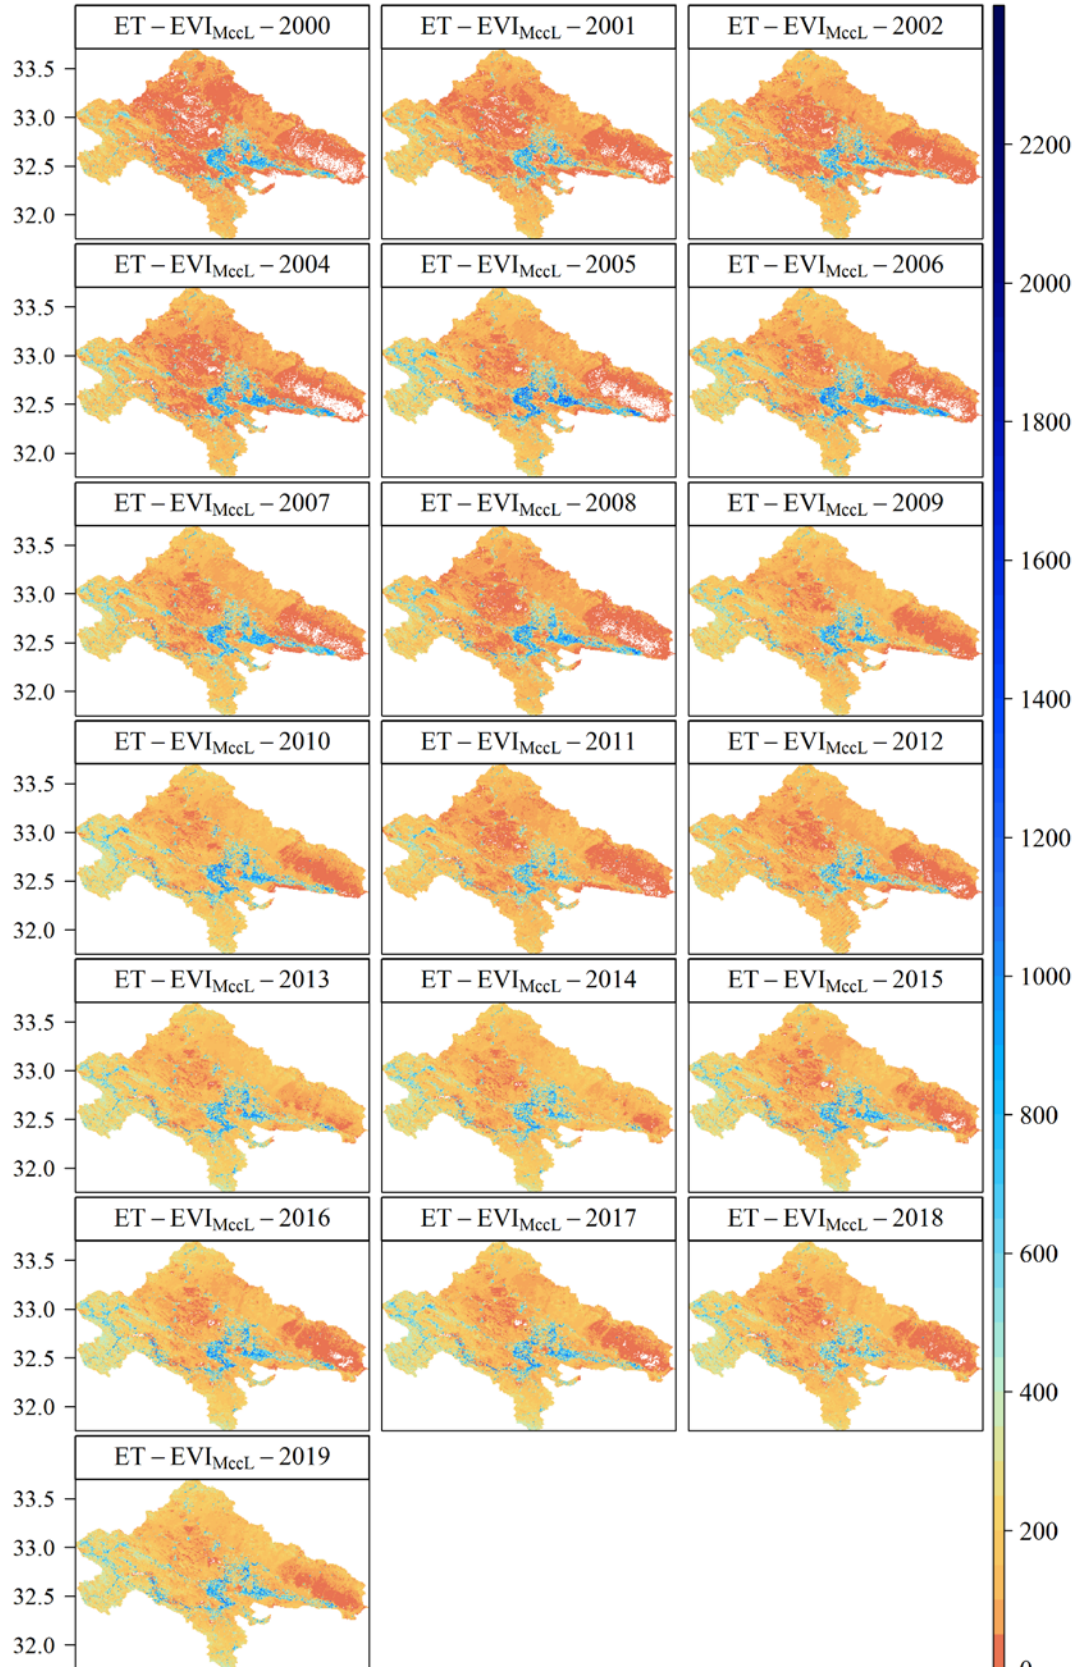

**Figure S4.** Annual maps of ET-EVI<sub>McclL</sub>.

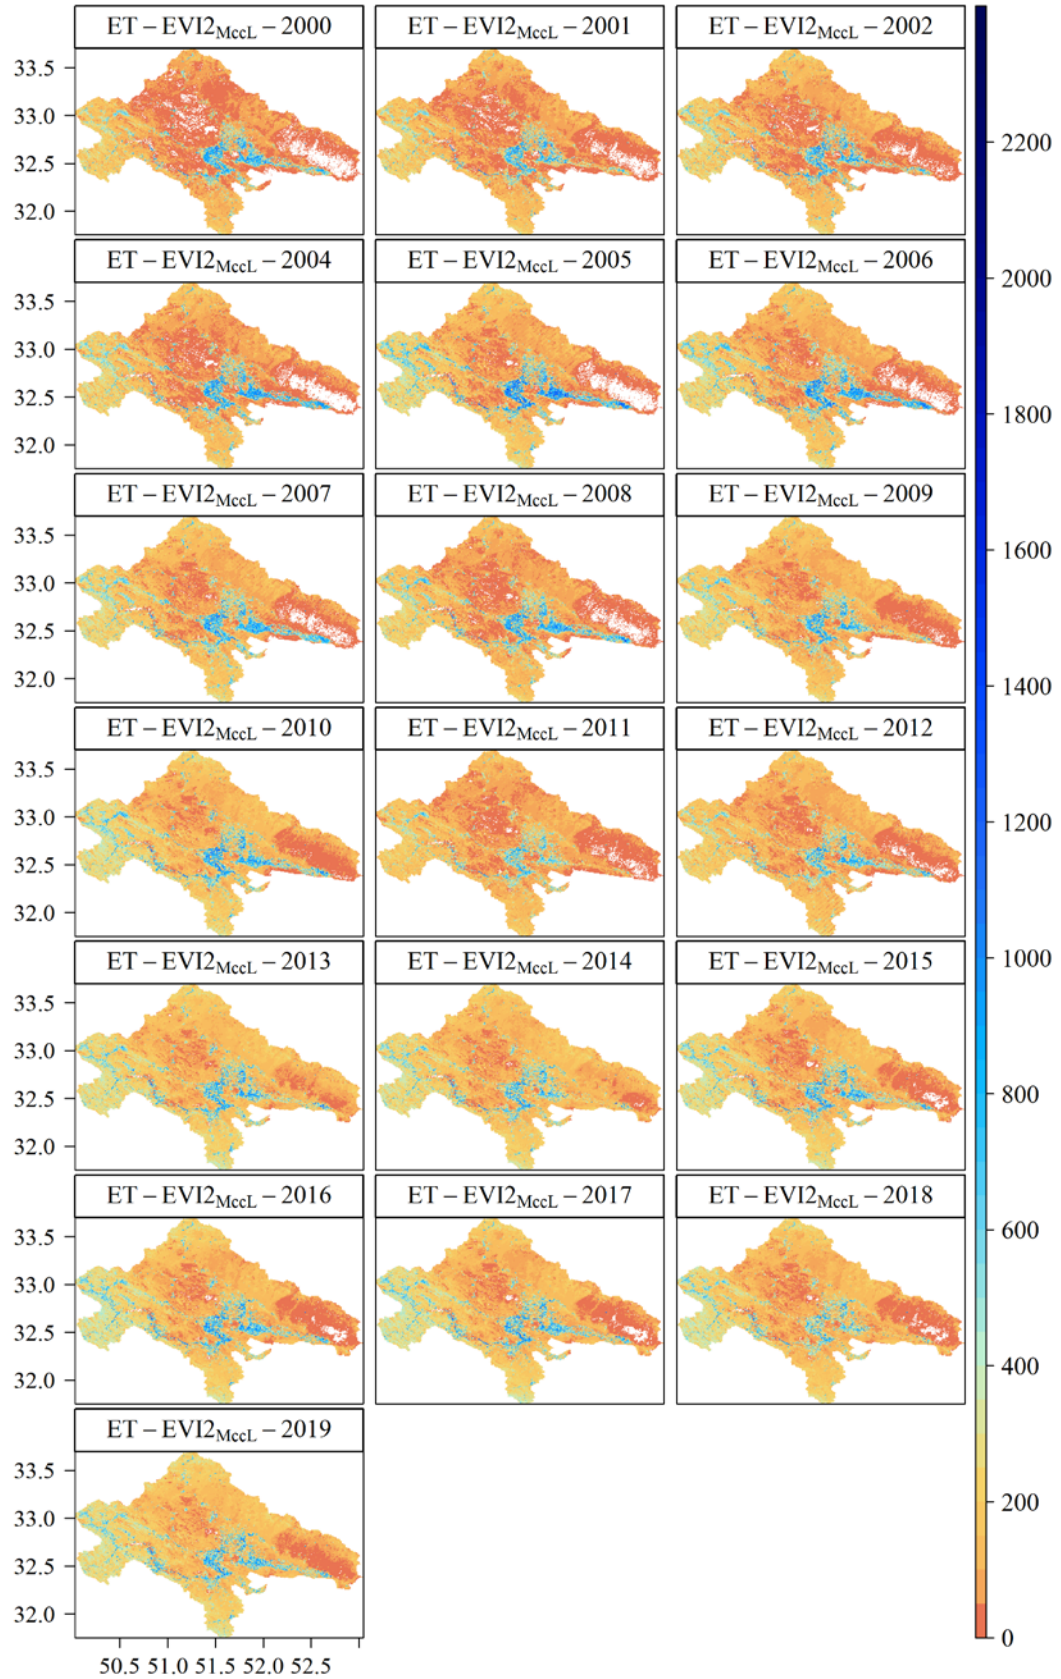

**Figure S5.** Annual maps of ET-EVI2<sub>McCL</sub>.

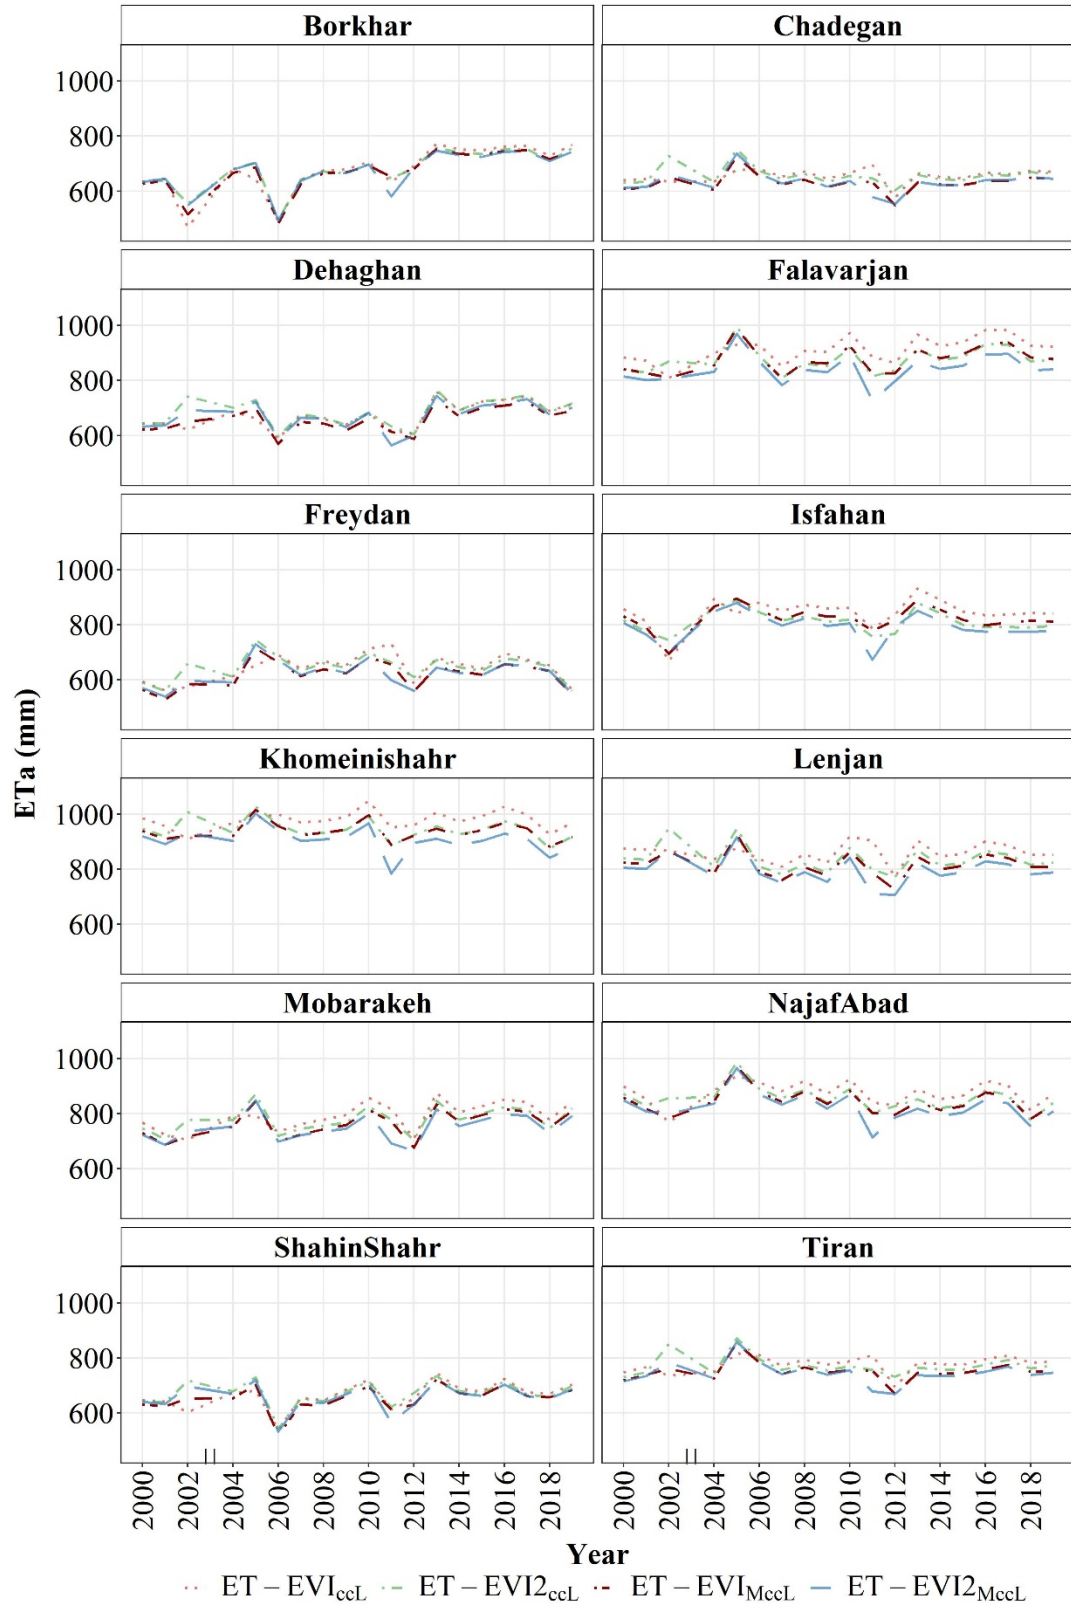

**Figure S6.** Annual graph of ET-VIs at county scale.

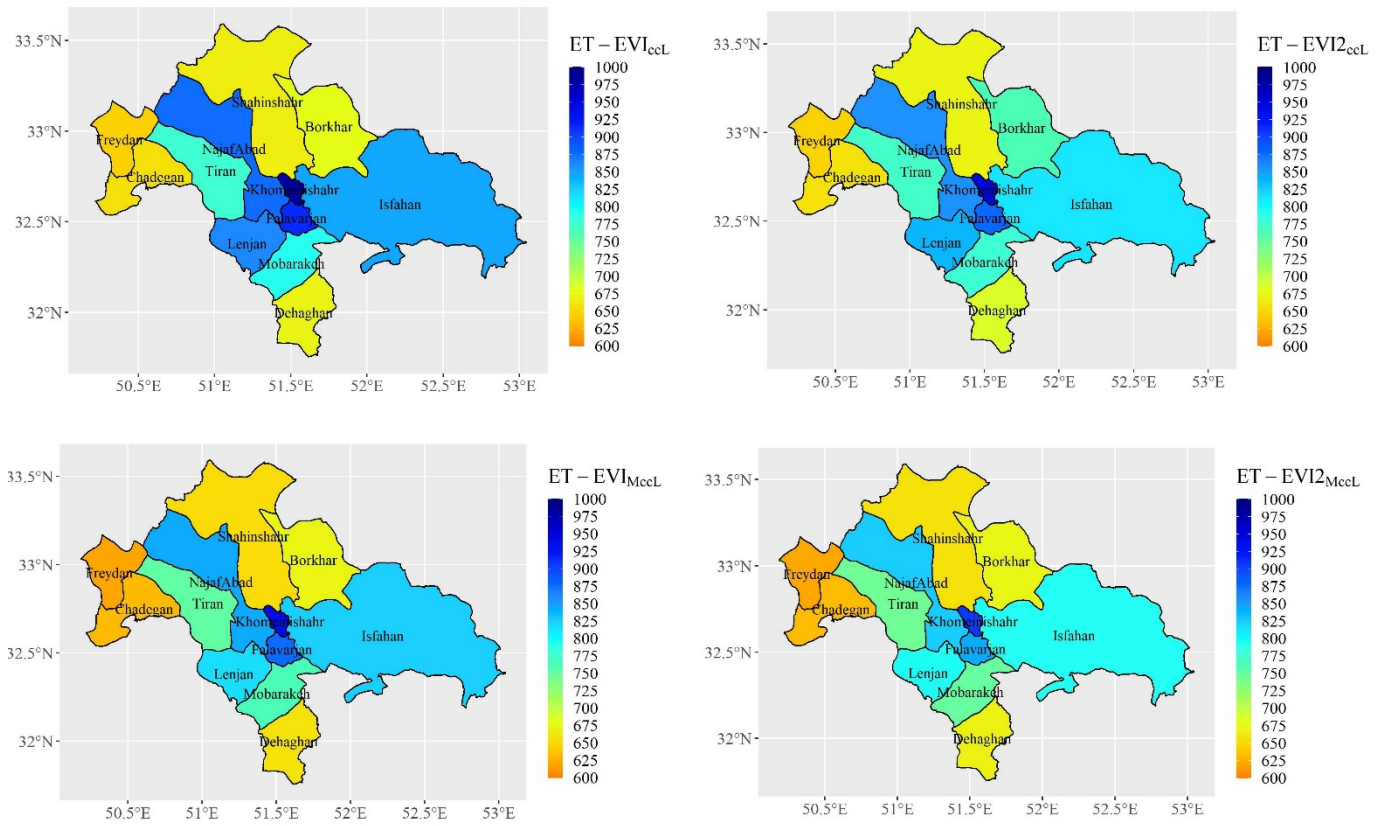

**Figure S7.** Long-term average ET-VIs at county scale.

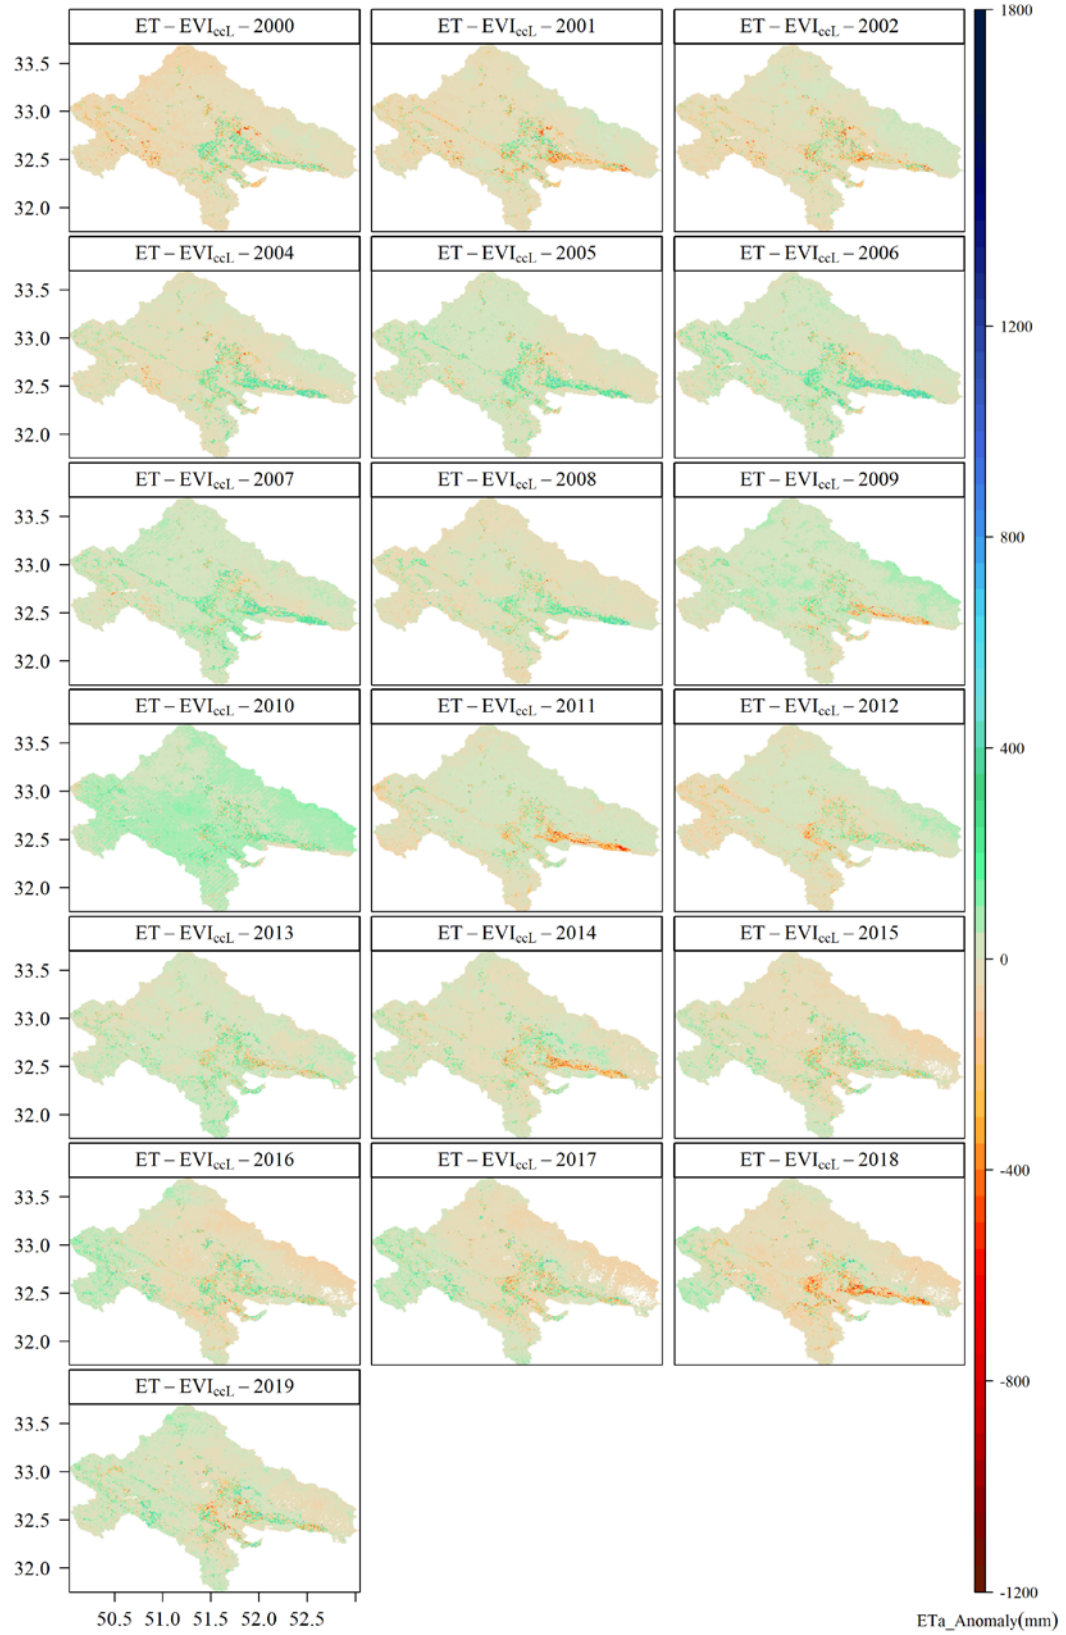

**Figure S8.** Annual anomaly maps of ET-EVI<sub>cL</sub>.

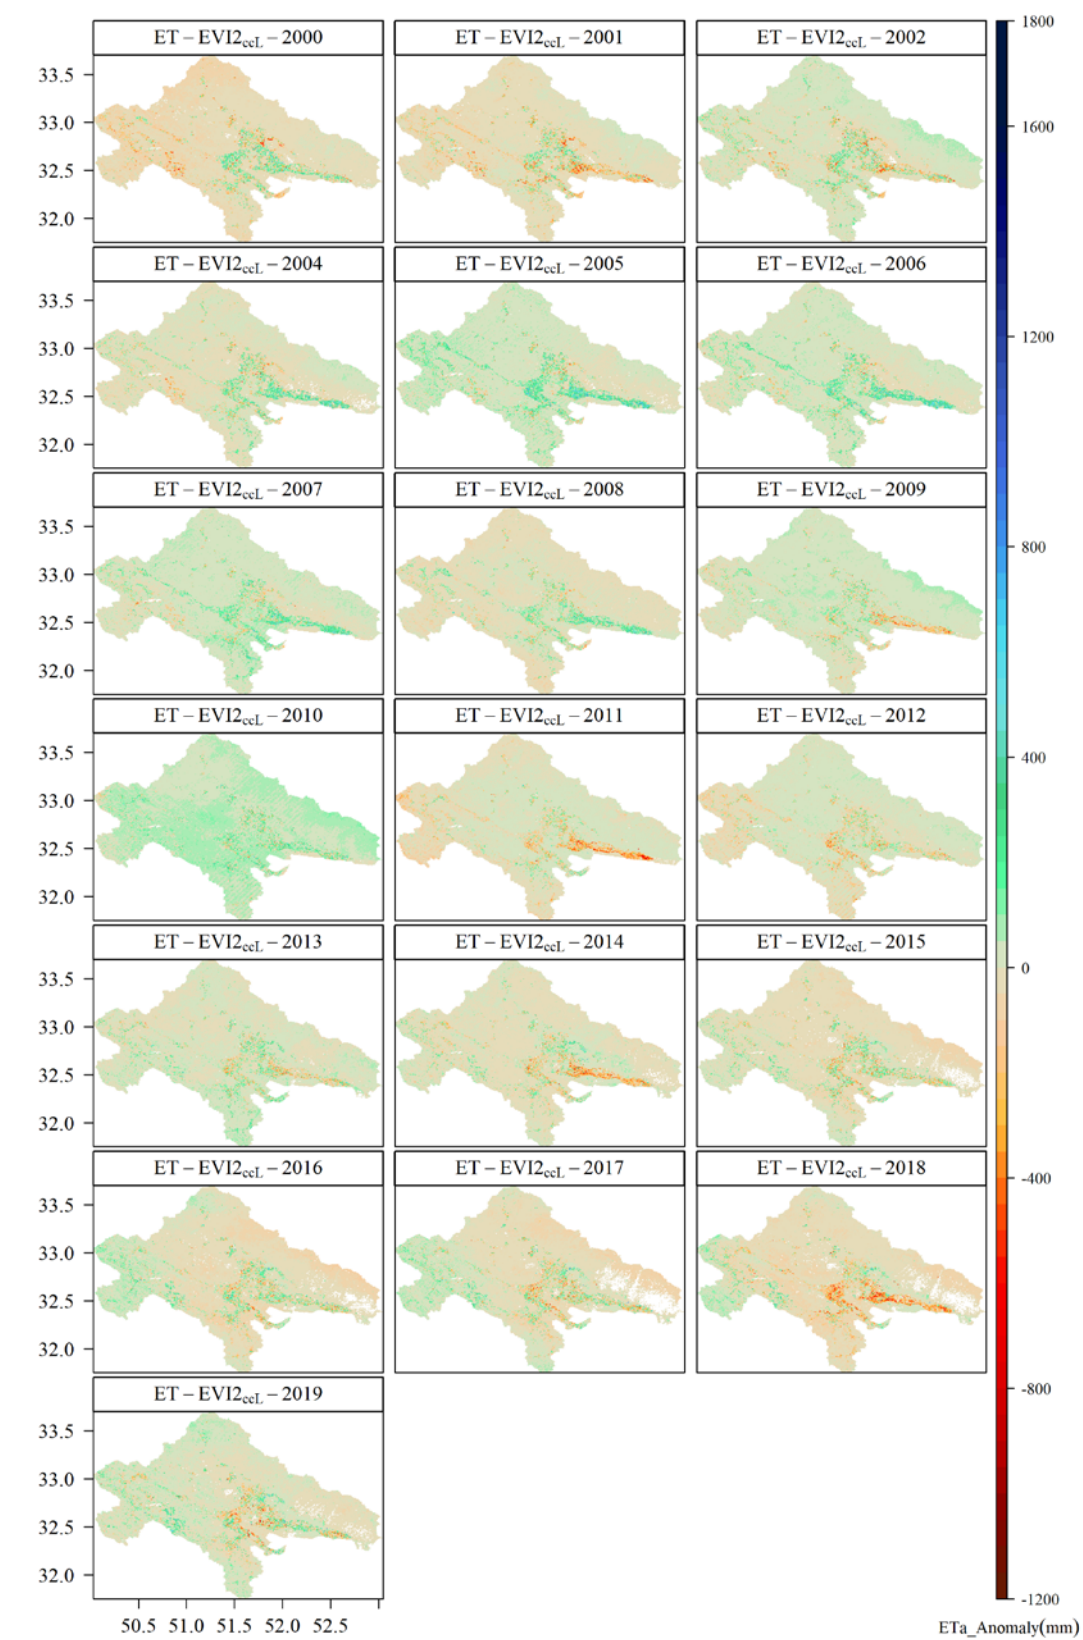

**Figure S9.** Annual anomaly maps of ET-EVI2<sub>ccl</sub>.

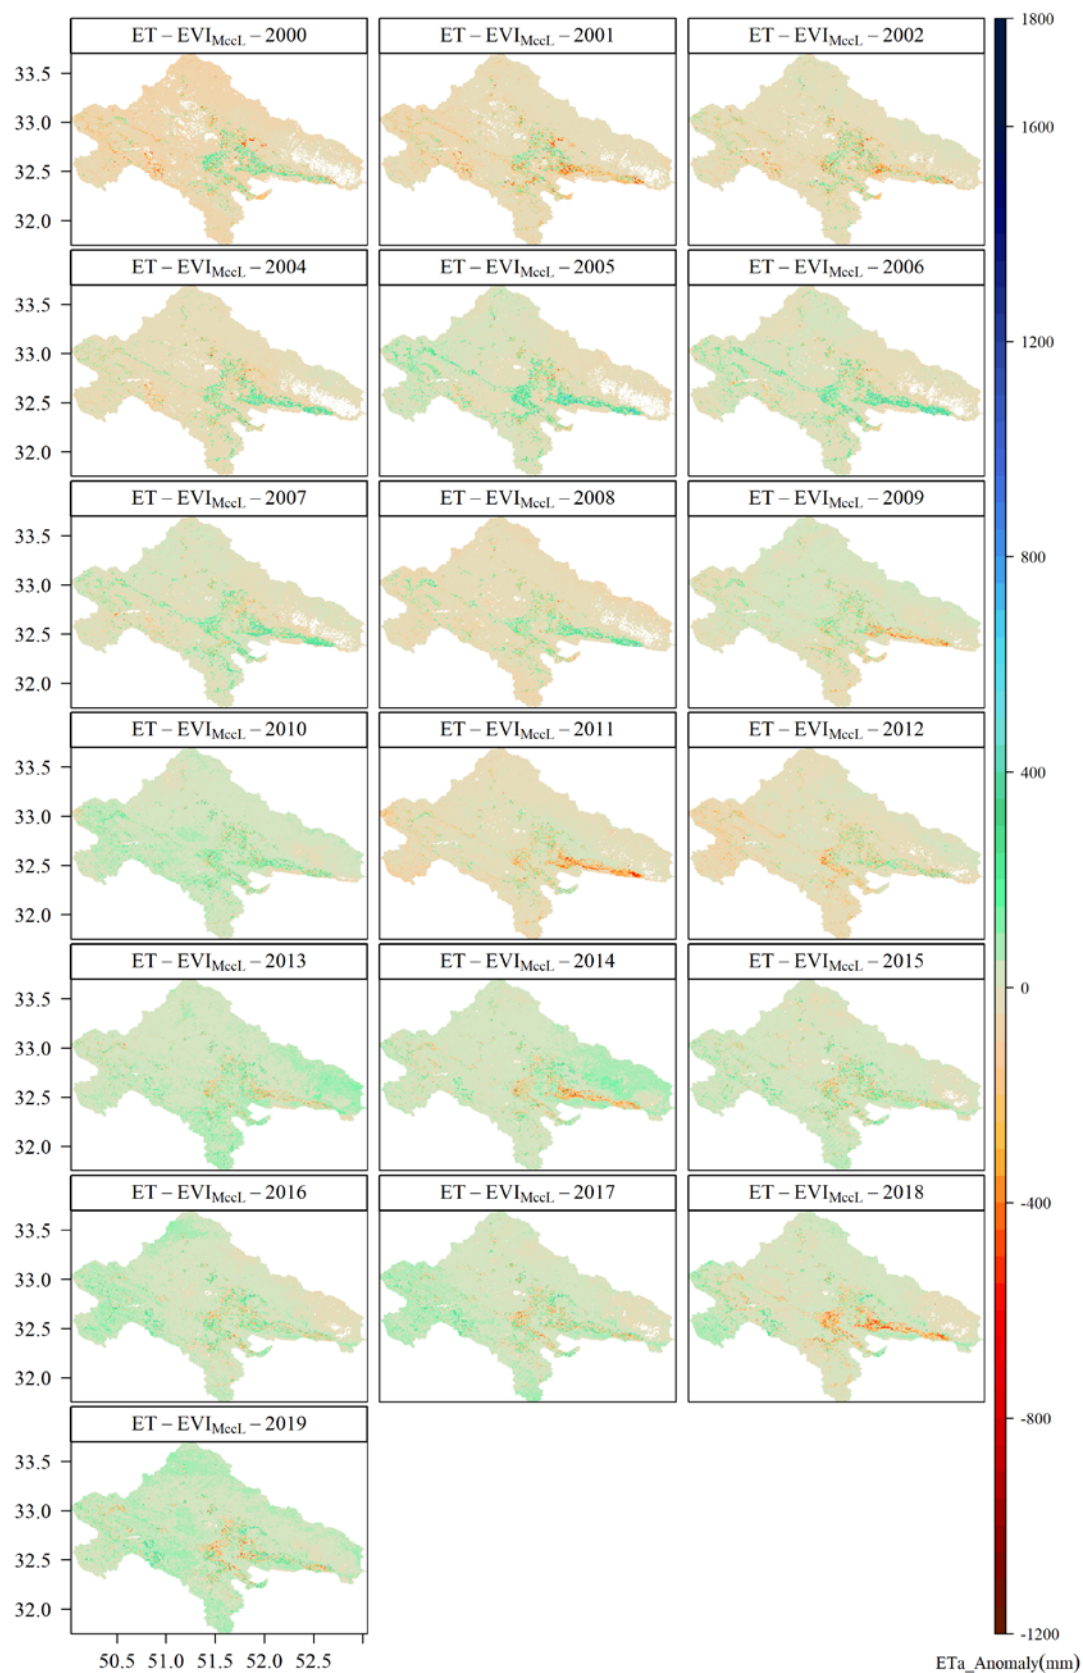

**Figure S10.** Annual anomaly maps of  $ET - EVI_{Mccl.}$ .

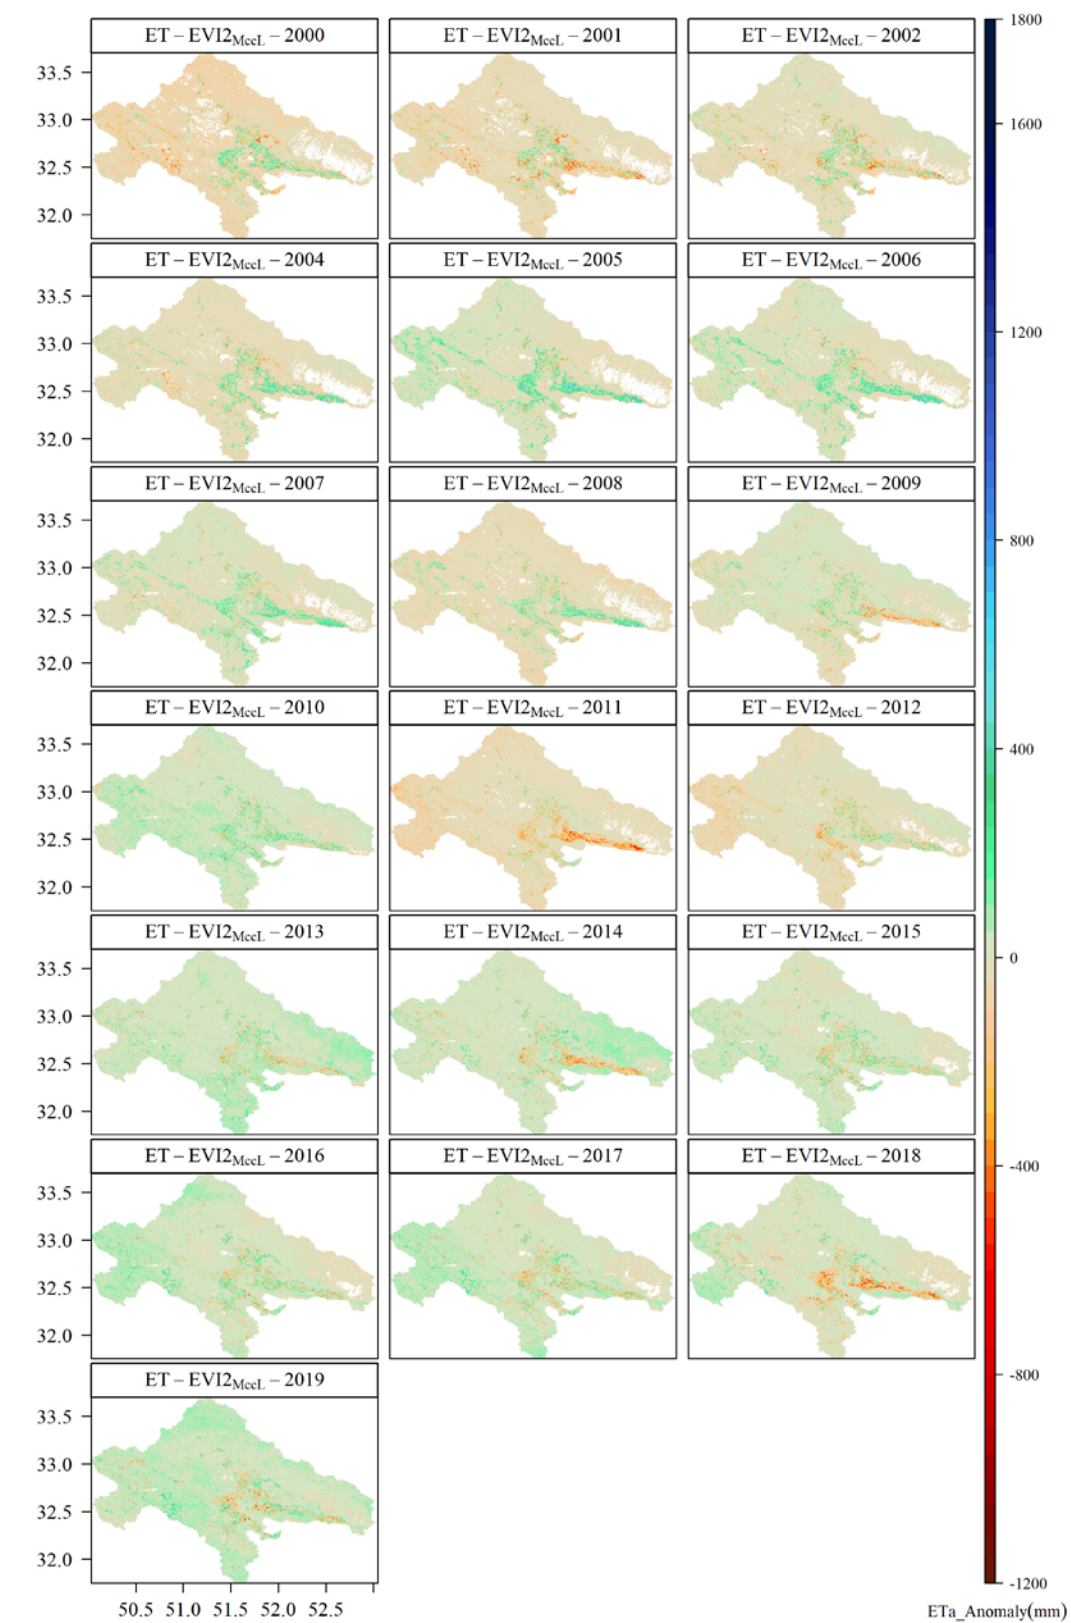

**Figure S11.** Annual anomaly maps of ET-EVI2<sub>McCL</sub>.

**Table S1.** Minimum, maximum, and long-term average of ET-VIs. Blue, orange, and green colors show the highest maximum, lowest minimum, and highest average ET-VIs estimates 1: Tiran, 2: Freydan, 3: Chadegan, 4: Isfahan, 5: Mobarakeh, 6: Borkhar, 7: Khomeinishahr, 8: Shahinshahr, 9: Falavarjan, 10: Lenjan, 11: Dehaghan, 12: NajafAbad. ET-EVI<sub>2MccL</sub> and ET-EVI<sub>MccL</sub>: ET calculated using 2- and 3-band Enhanced Vegetation Index (MODIS continuity corrected Landsat) respectively; ET-EVI<sub>2ccL</sub> and ET-EVI<sub>ccL</sub>: ET calculated using 2- and 3-band Enhanced Vegetation Index (continuity-corrected Landsat) respectively.

| ET-VI                   | Parameter | Basin | 1       | 2       | 3       | 4       | 5       | 6       | 7        | 8       | 9       | 10      | 11      | 12      |
|-------------------------|-----------|-------|---------|---------|---------|---------|---------|---------|----------|---------|---------|---------|---------|---------|
| ET-EVI <sub>ccL</sub>   | Max       | 827   | 81<br>7 | 73<br>0 | 69<br>6 | 93<br>2 | 87<br>6 | 77<br>2 | 104<br>8 | 74<br>7 | 98<br>5 | 91<br>9 | 75<br>8 | 93<br>7 |
|                         | Min       | 644   | 69<br>5 | 57<br>4 | 57<br>6 | 66<br>8 | 70<br>4 | 49<br>2 | 910      | 54<br>0 | 80<br>9 | 77<br>3 | 58<br>8 | 76<br>9 |
|                         | Average   | 778   | 77<br>8 | 64<br>5 | 65<br>6 | 84<br>5 | 79<br>2 | 67<br>8 | 979      | 66<br>6 | 91<br>4 | 86<br>1 | 67<br>2 | 87<br>6 |
| ET-EVI <sub>2ccL</sub>  | Max       | 854   | 87<br>1 | 74<br>5 | 75<br>3 | 89<br>0 | 87<br>1 | 75<br>7 | 102<br>8 | 73<br>4 | 99<br>5 | 94<br>9 | 76<br>4 | 98<br>7 |
|                         | Min       | 714   | 73<br>0 | 56<br>0 | 60<br>4 | 74<br>4 | 70<br>5 | 49<br>4 | 875      | 54<br>2 | 81<br>0 | 77<br>3 | 59<br>7 | 77<br>5 |
|                         | Average   | 762   | 77<br>2 | 64<br>6 | 65<br>7 | 81<br>2 | 77<br>9 | 68<br>0 | 945      | 67<br>2 | 87<br>7 | 83<br>7 | 68<br>5 | 85<br>6 |
| ET-EVI <sub>MccL</sub>  | Max       | 841   | 85<br>7 | 71<br>6 | 72<br>6 | 89<br>5 | 84<br>6 | 75<br>3 | 101<br>8 | 72<br>3 | 99<br>0 | 92<br>8 | 73<br>1 | 97<br>3 |
|                         | Min       | 654   | 66<br>9 | 52<br>9 | 54<br>9 | 69<br>5 | 67<br>6 | 48<br>3 | 883      | 52<br>0 | 80<br>8 | 72<br>6 | 56<br>9 | 78<br>1 |
|                         | Average   | 752   | 75<br>2 | 62<br>1 | 63<br>2 | 82<br>4 | 76<br>3 | 67<br>3 | 937      | 65<br>3 | 87<br>7 | 81<br>6 | 65<br>8 | 84<br>4 |
| ET-EVI <sub>2MccL</sub> | Max       | 838   | 85<br>9 | 72<br>9 | 73<br>7 | 87<br>9 | 84<br>8 | 74<br>7 | 100<br>2 | 71<br>9 | 97<br>0 | 91<br>7 | 74<br>4 | 96<br>6 |
|                         | Min       | 657   | 66<br>9 | 53<br>9 | 55<br>3 | 70<br>1 | 66<br>4 | 49<br>3 | 785      | 53<br>2 | 72<br>8 | 70<br>7 | 56<br>4 | 71<br>4 |
|                         | Average   | 738   | 74<br>5 | 62<br>1 | 63<br>2 | 79<br>4 | 75<br>1 | 67<br>3 | 907      | 65<br>8 | 84<br>2 | 79<br>5 | 67<br>0 | 82<br>6 |
